# Supplementary material for: Long-term non-progression and risk factors for disease progression among children living with HIV in Botswana and Uganda: A retrospective cohort study
Source: PubMed Central journal article supplement (PMC10843817; doi:10.1016/j.ijid.2023.11.030), 2023-11-28

A

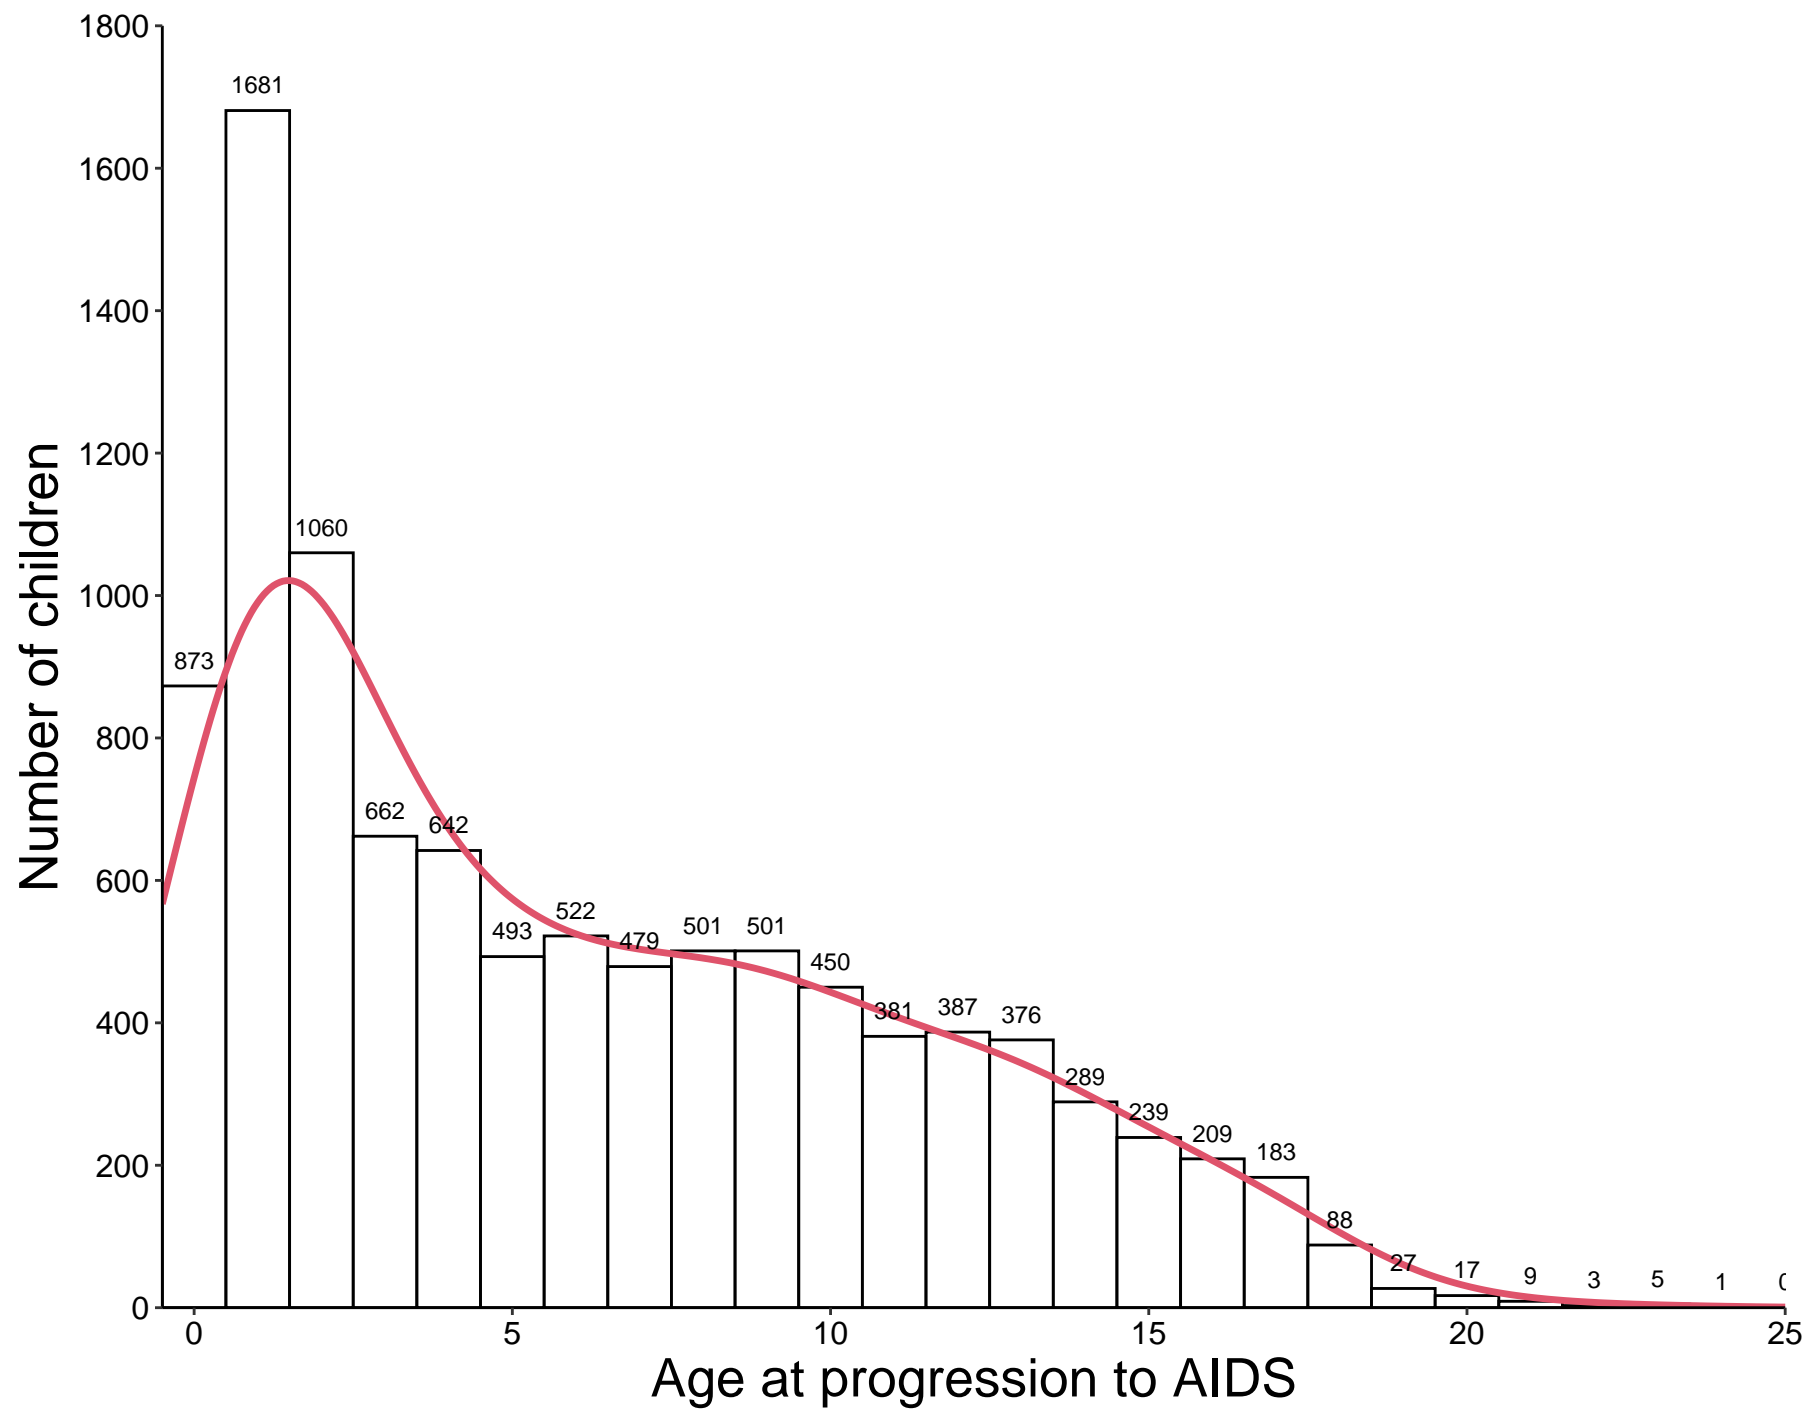

B

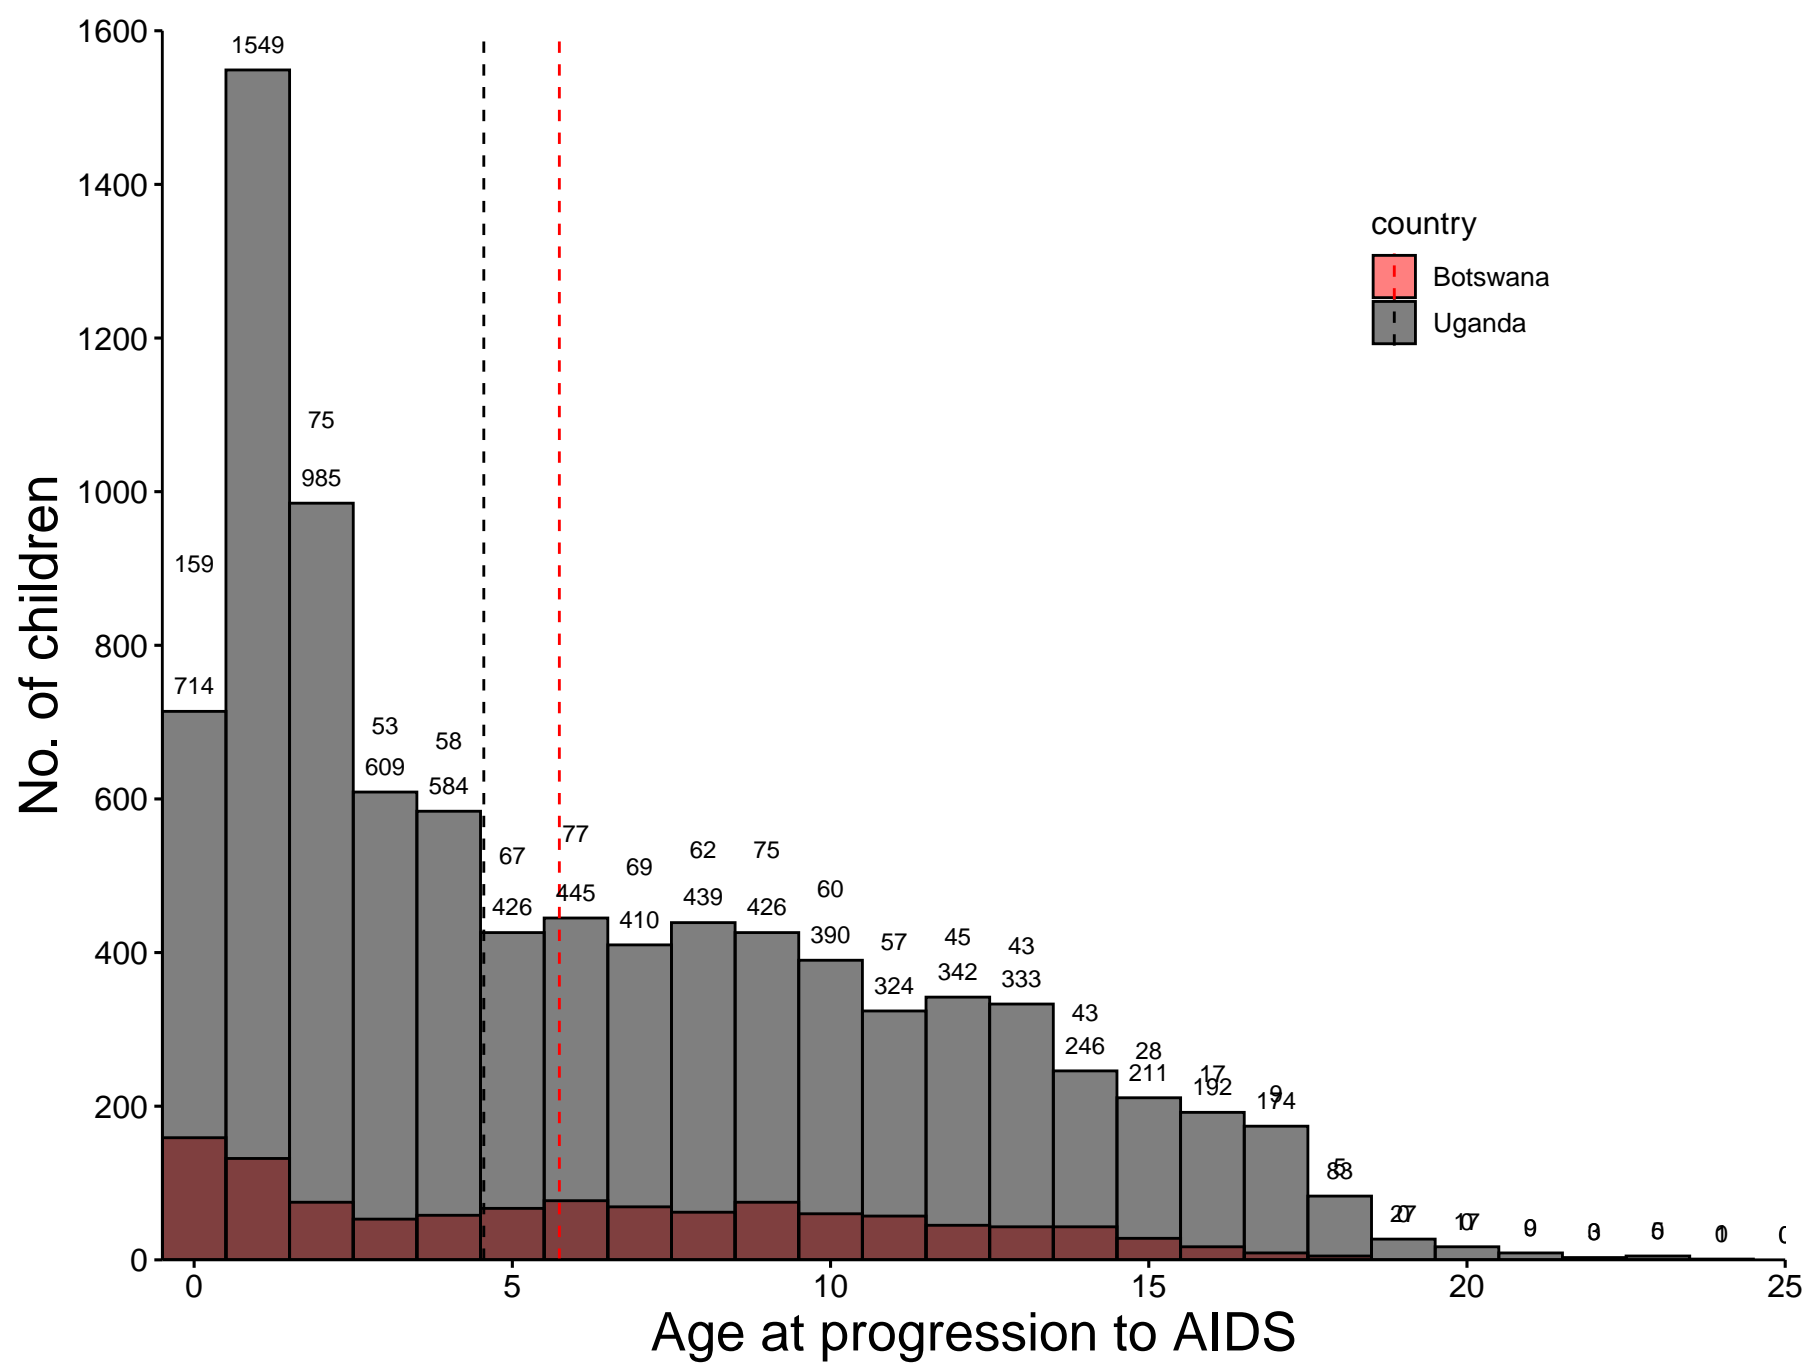

Supplement: NIHMS1958773-supplement-3.pdf [file NIHMS1958773-supplement-3.pdf]
